# Supplementary material for: Development and implementation of a simple and rapid extraction-free saliva SARS-CoV-2 RT-LAMP workflow for workplace surveillance
Source: PubMed Central journal article supplement (PMC9135294; doi:10.1371/journal.pone.0268692), 2022-05-26
Supplement: pone.0268692.s005.pdf [file pone.0268692.s005.pdf]

# Figure S5. Electronic Health Records Portal: cov.neb.com

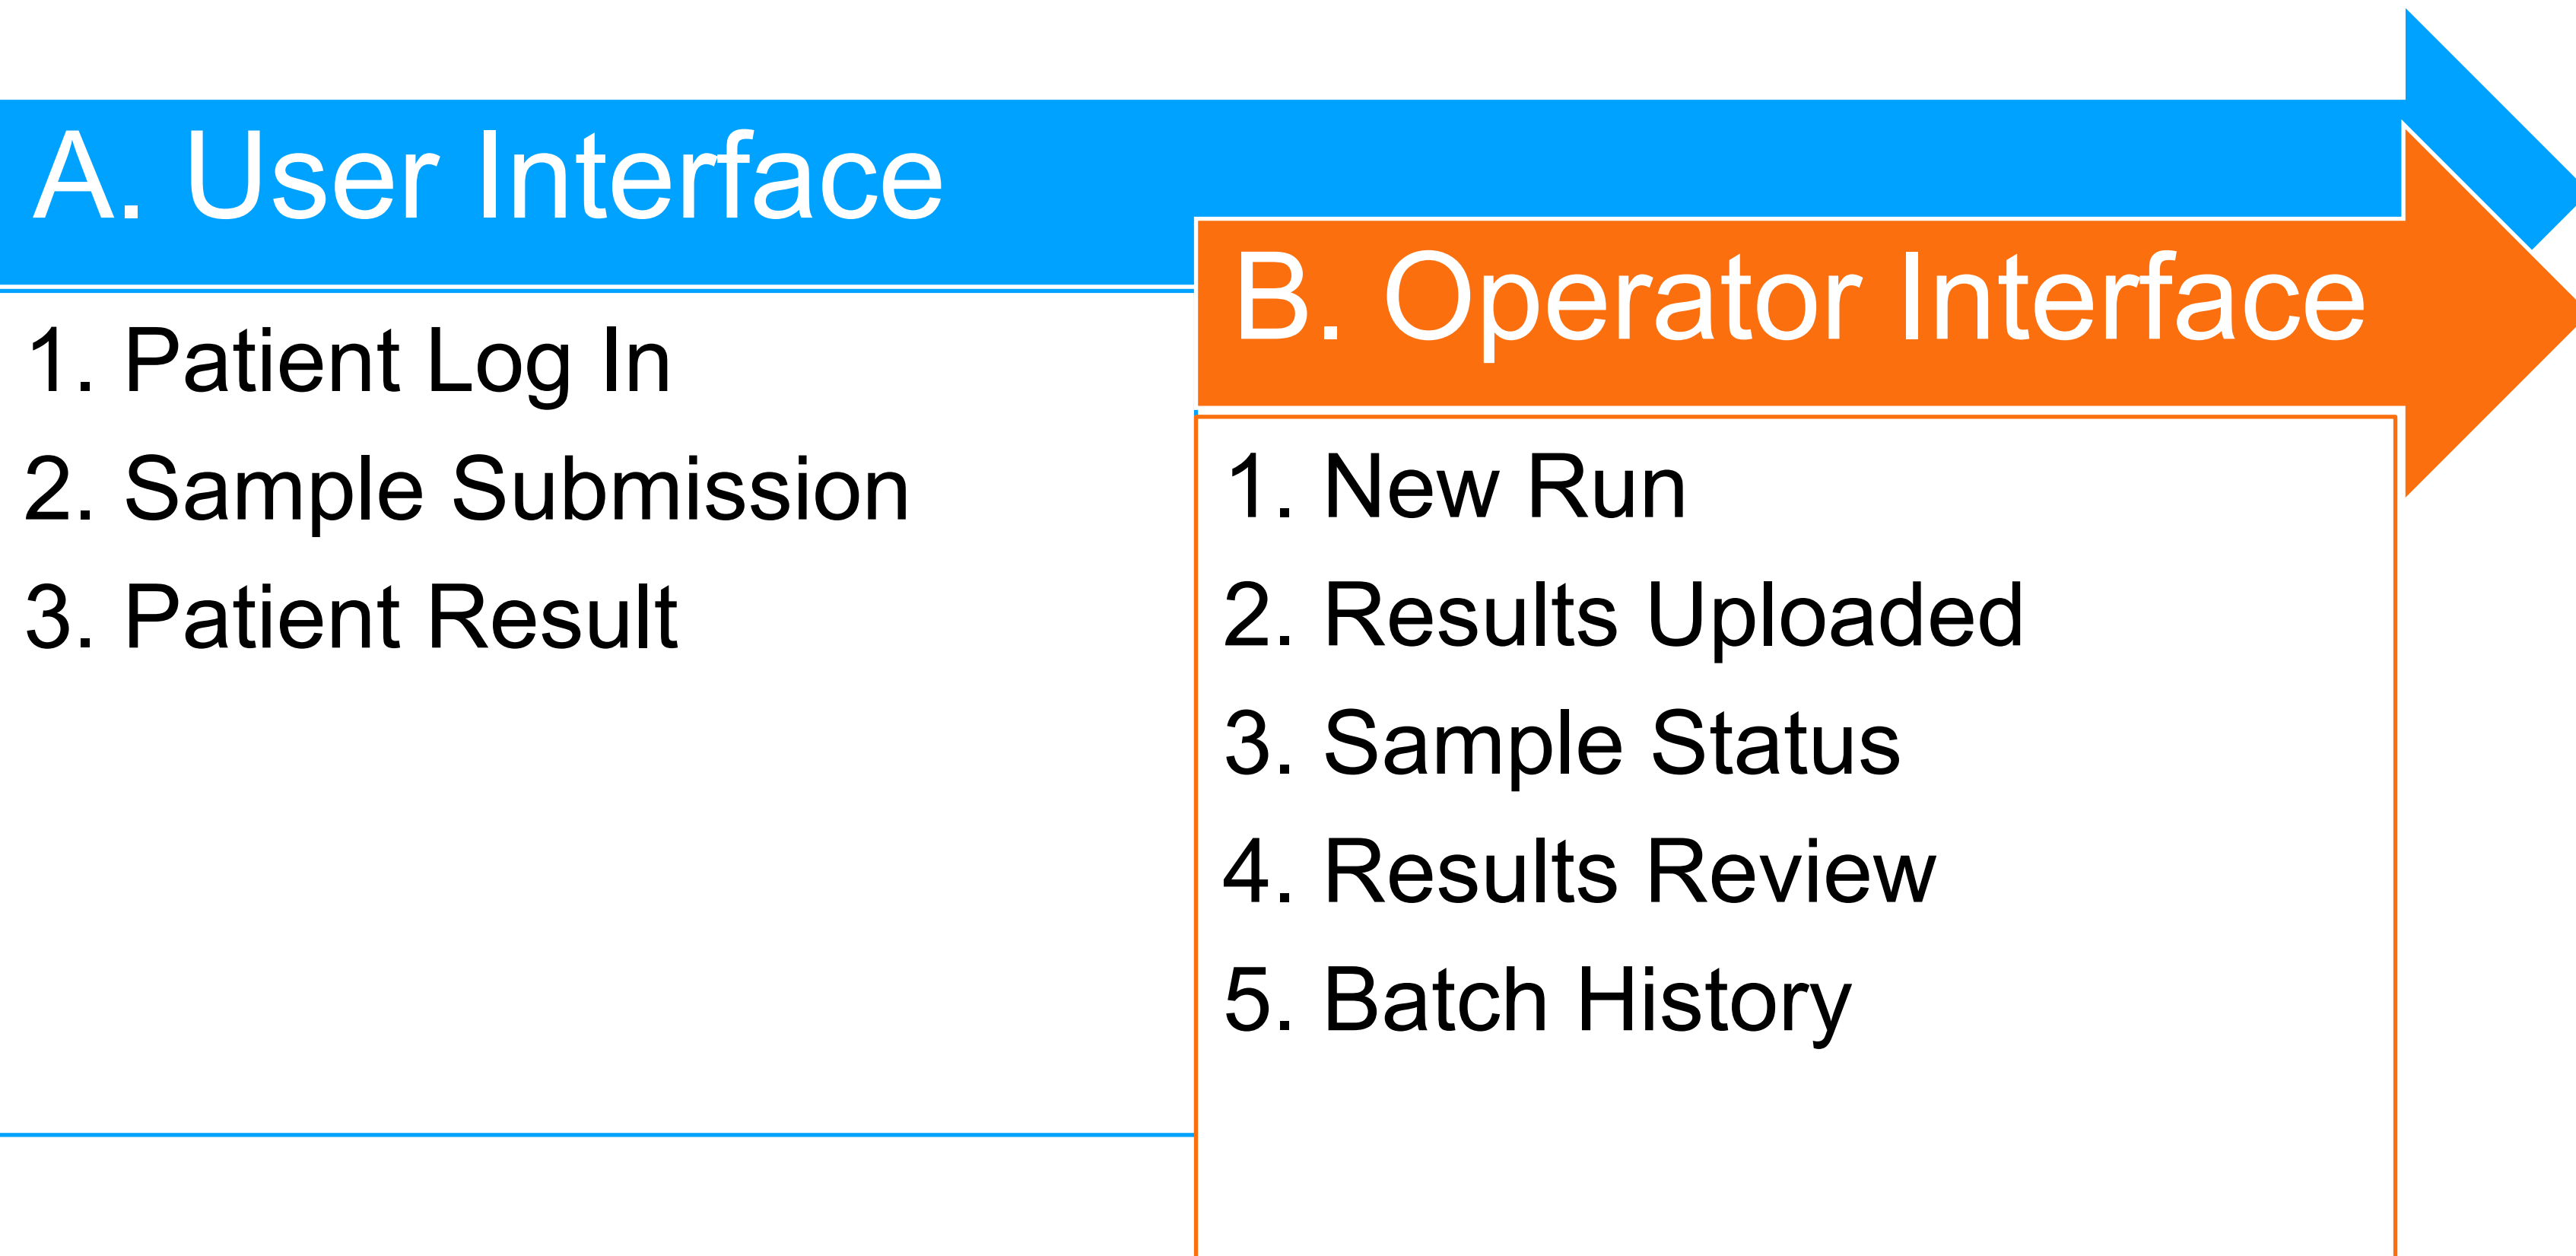

# A. User Interface

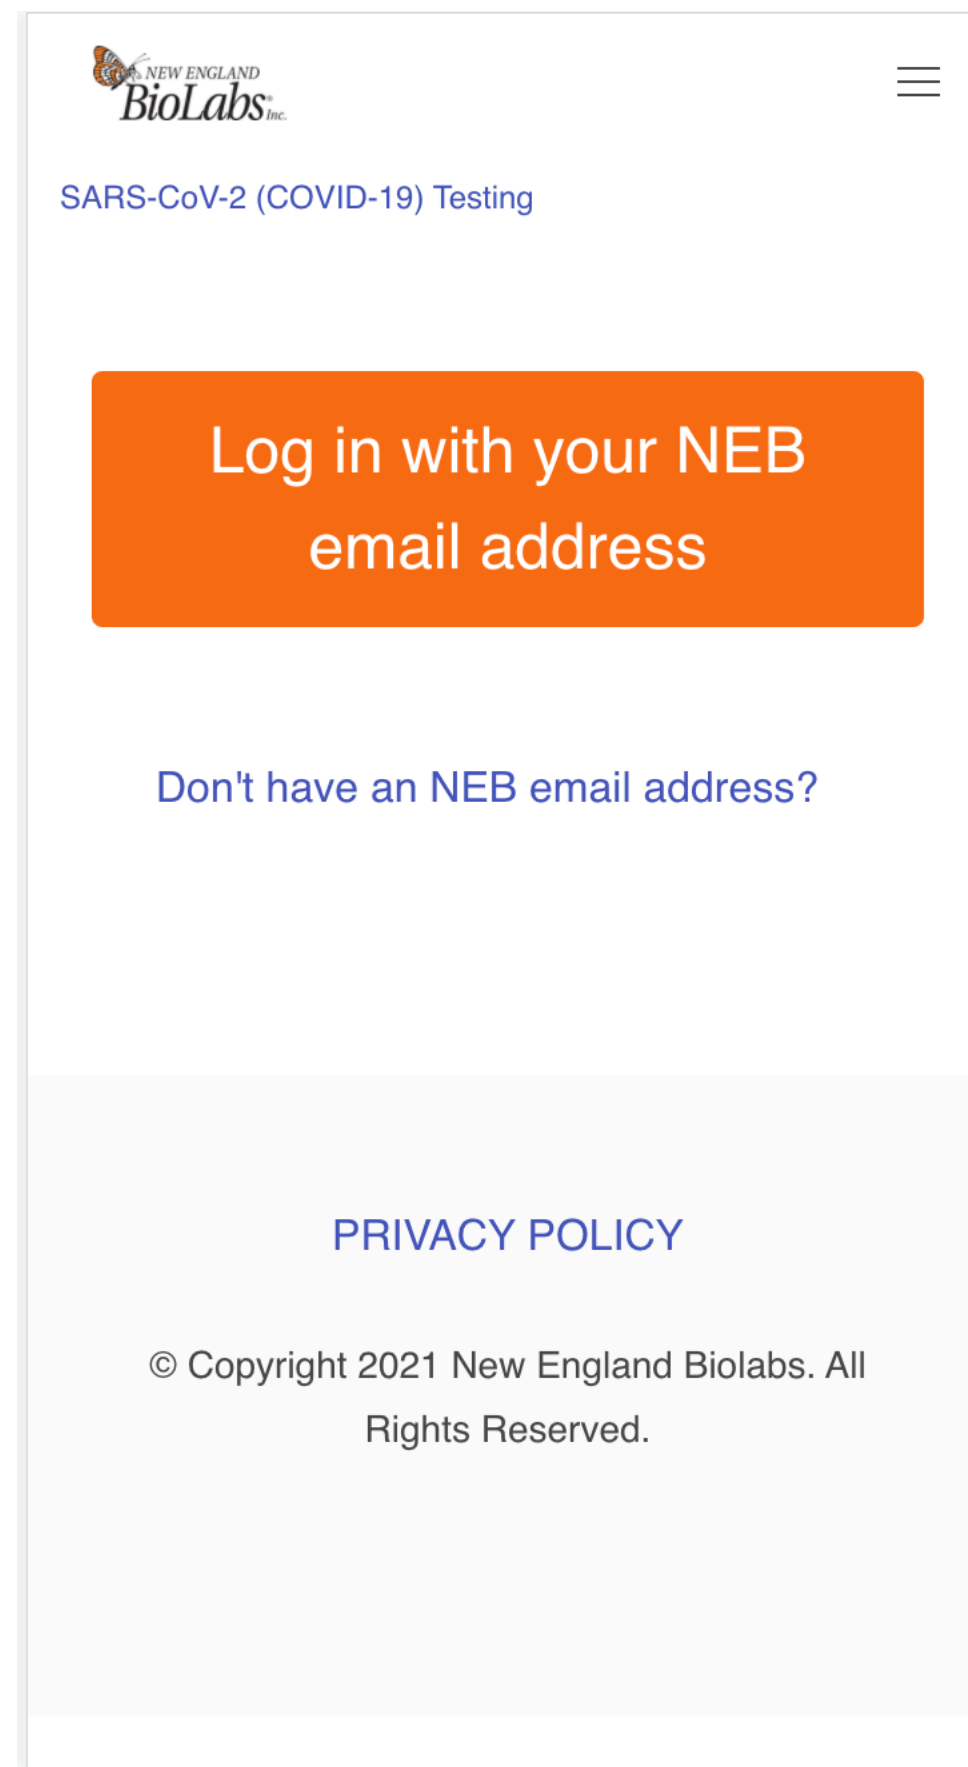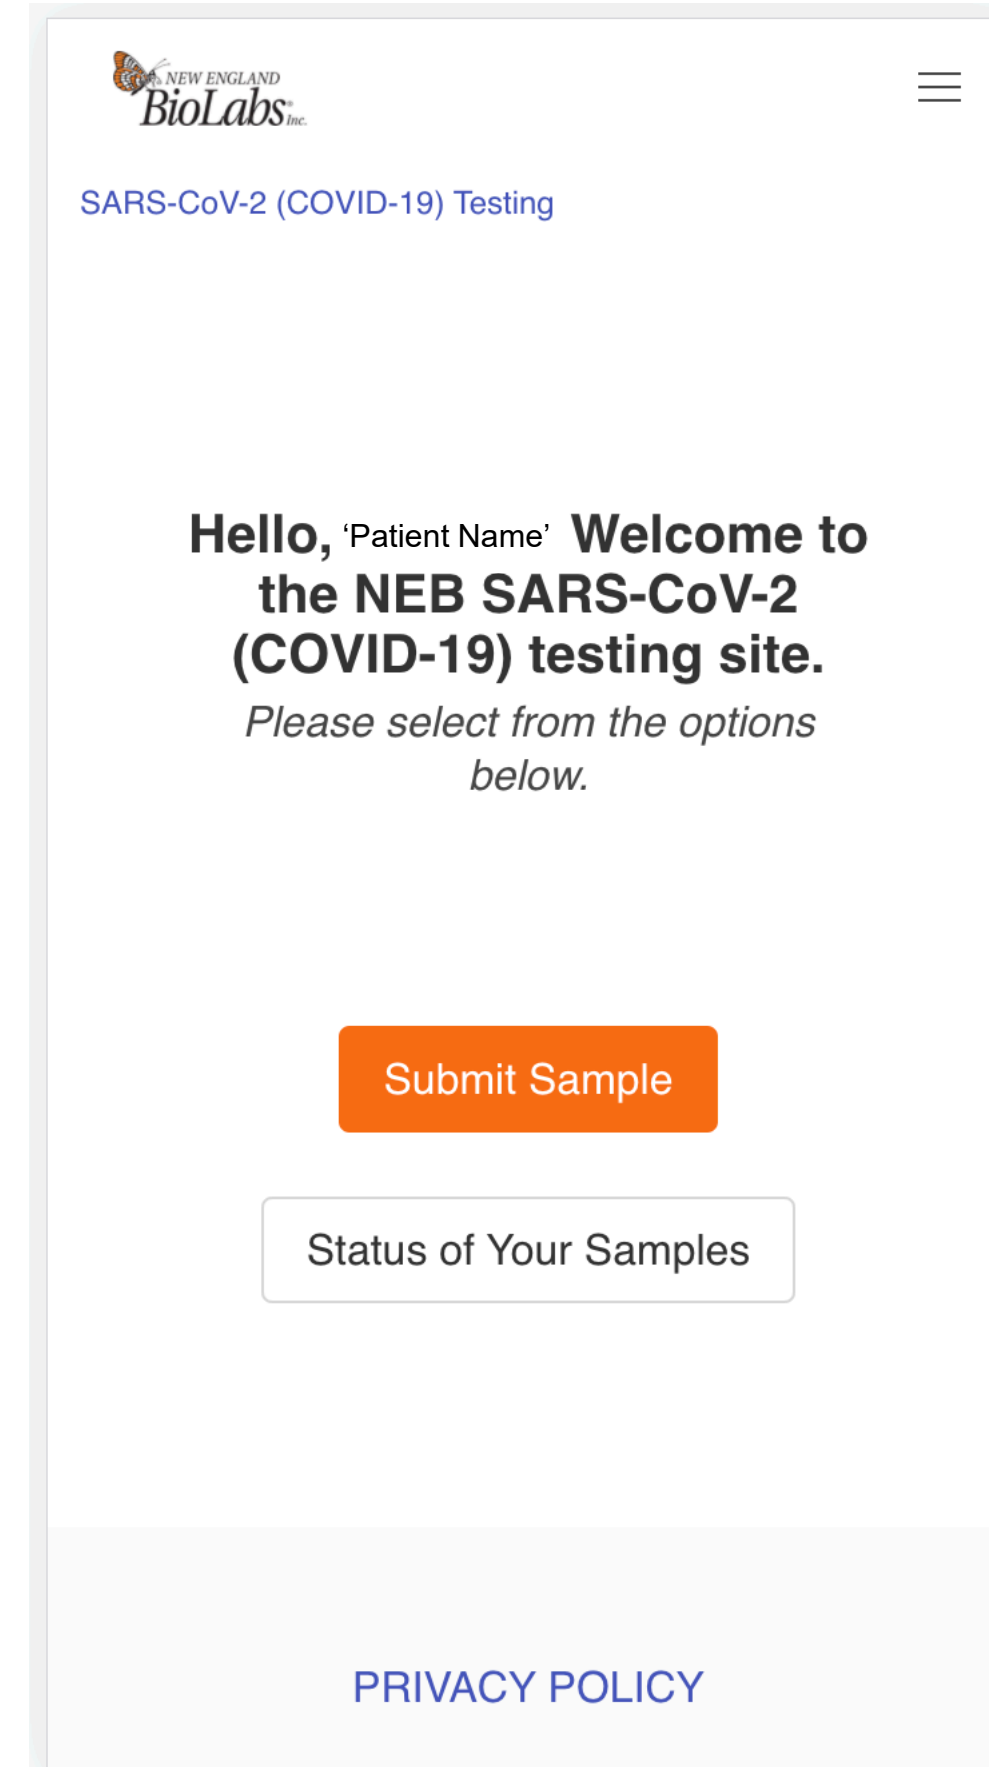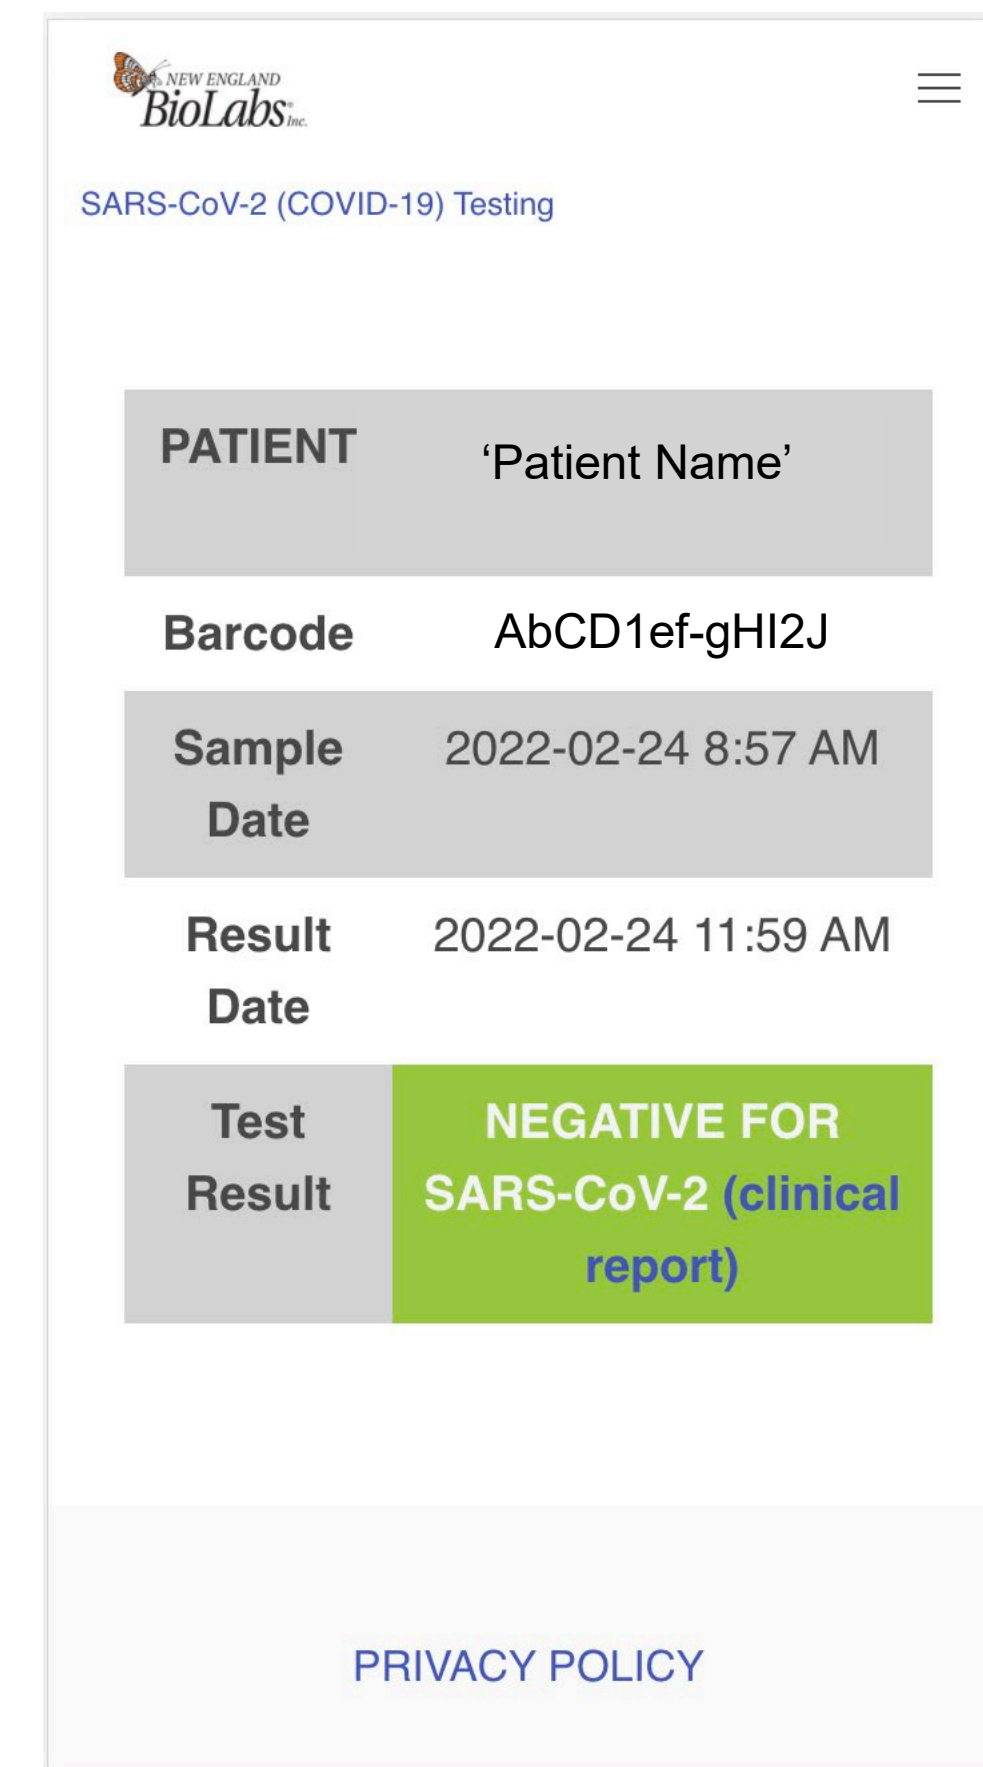

# B. Operator Interface

The screenshot shows the operator interface for the NEB SARS-CoV-2 (COVID-19) testing site. At the top left is the logo for New England Biolabs, Inc. The main header contains the text "SARS-CoV-2 (COVID-19) Testing" followed by navigation links: "Runs", "Amp. Details", "Sample Status", "Finalize Batch", and "Result Batches". On the right side of the header, it says "Logged in as: cov-admin" with a "Sign out" button.

The main content area features a welcome message: "Hello, Admin. Welcome to the NEB SARS-CoV-2 (COVID-19) testing site." followed by the instruction "Please select from the options below." Below this, there are three columns of buttons. The first column contains "Runs" (highlighted in orange), "Amp. Details", "Sample Status", and "Results Summary". The second column contains "Submit Sample", "Status of Your Samples", "Release Pending", and "Result Batches". The third column contains "Submitters", "Thermometers", and "Labels".

At the bottom of the page, there is a "PRIVACY POLICY" link and a copyright notice: "© Copyright 2021 New England Biolabs. All Rights Reserved."



# B1. New Run

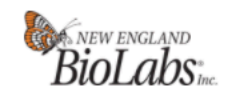

## New Run

Operator

Suffix  e.g. Rack01

Instrument checks  
 neg80\_freezer  neg20\_freezer  cold\_box\_32022  cold\_box\_BL2  biosafety\_cabinet   
 thermomixer  liquid\_handler  thermocycler  scanner

Check All

### Inactivation

# of samples expected

Layout images  No file chosen

Oven temperature Before:  After:

### Lysis

Plate barcodes SLB:  SARS-CoV-2:  Actin:

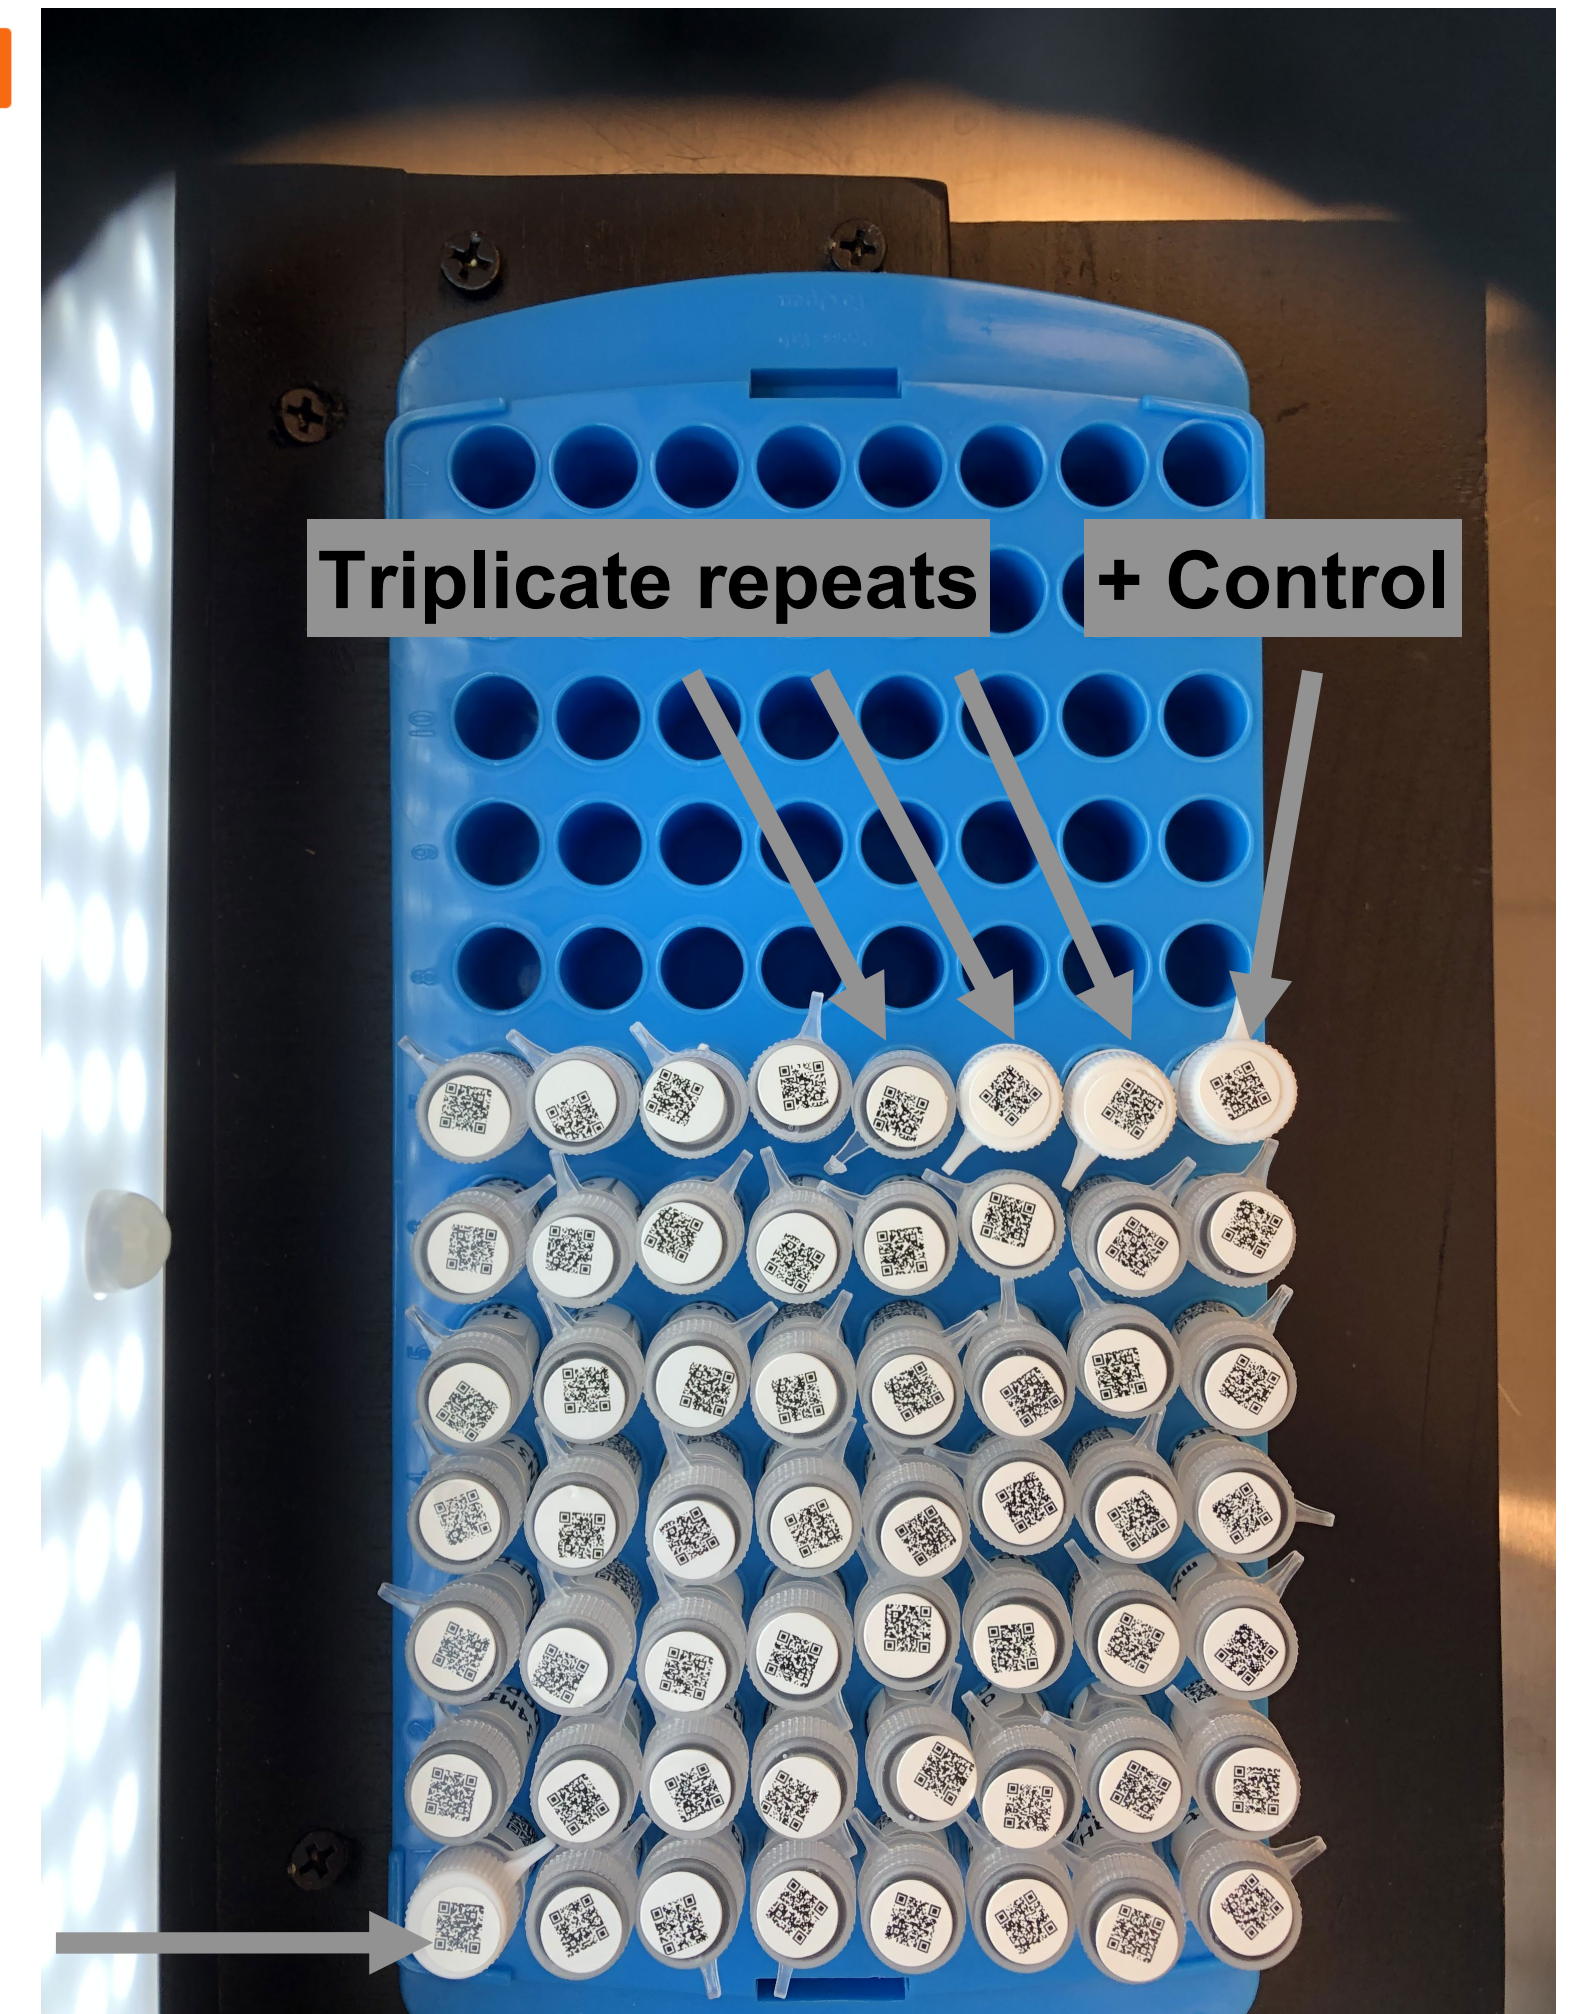

# B2. Results Upload

## *Amplification*

|                        |                                                           |
|------------------------|-----------------------------------------------------------|
| Bio-Rad Plate Map      | <a href="#">Bio-Rad plate map</a>                         |
| Plate Barcode          | <input type="text" value="6759475320"/>                   |
| Target                 | <input type="text" value="SARS-CoV-2 N2+E1"/>             |
| Operator               | <input type="text" value="rmoncion"/>                     |
| Bio-Rad .pcrd file     | <input type="button" value="Choose File"/> No file chosen |
| Cq Results .xlsx file  | <input type="button" value="Choose File"/> No file chosen |
| Amp Results .xlsx file | <input type="button" value="Choose File"/> No file chosen |

[Current .pcrd File](#)

[Current Cq File](#)

[Current Amp Results File](#)

## *Plate Images*

|                 |                                                           |
|-----------------|-----------------------------------------------------------|
| Pre-Amp. Image  | <input type="button" value="Choose File"/> No file chosen |
| Post-Amp. Image | <input type="button" value="Choose File"/> No file chosen |

[Current Pre-Amp Image](#)

[Current Post-Amp Image](#)

[Update Bio rad experiment](#)

[Destroy](#) | [Run](#)



# B3. Sample Status

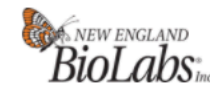

## Samples

All Incomplete

**New**

In Progress

Final Release Pending

Invalid

Not Received

Check All 17 samples match status: New

Show 100 entries Copy

Search:

| Sample Date         | Sample              | Experiments | SARS Cqs | Human Cqs | Result         | Release Result | Notes                                 |
|---------------------|---------------------|-------------|----------|-----------|----------------|----------------|---------------------------------------|
| 2022-03-01 9:20 AM  | AbCD1ef-gHI2J (New) |             |          |           | Result Pending | no data        | <input type="text" value="Notes..."/> |
| 2022-03-01 11:01 AM | AbCD2ef-gHI2J (New) |             |          |           | Result Pending | no data        | <input type="text" value="Notes..."/> |
| 2022-03-01 12:05 PM | AbCD3ef-gHI2J (New) |             |          |           | Result Pending | no data        | <input type="text" value="Notes..."/> |

# B4. Result Review

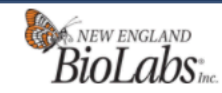

## Release Pending Results

Temperature log

Choose File Temperature logs (107).xlsx

Uncheck All

Show 1,000 entries Copy

Search:

| Sample Registration Date | Sample        | SARS-CoV-2 Cq Values | Human Cq Values | Result       | Confirm                             | Notes |
|--------------------------|---------------|----------------------|-----------------|--------------|-------------------------------------|-------|
| 2022-03-02<br>1:11 PM    | AbCD1ef-gHI2J | N/A                  | 27.3            | not_detected | <input checked="" type="checkbox"/> |       |
| 2022-03-02<br>3:56 PM    | AbCD2ef-gHI2J | N/A                  | 25.3            | not_detected | <input checked="" type="checkbox"/> |       |
| 2022-03-02<br>3:58 PM    | AbCD3ef-gHI2J | N/A                  | 25.6            | not_detected | <input checked="" type="checkbox"/> |       |
| 2022-03-02<br>4:03 PM    | AbCD4ef-gHI2J | N/A                  | 28.0            | not_detected | <input checked="" type="checkbox"/> |       |

# B5. Batch History

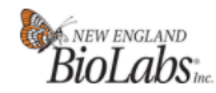

SARS-CoV-2 (COVID-19) Testing

Runs

Amp. Details

Sample Status

Finalize Batch

Result Batches

Logged in as: cov-admin

Sign out

## SARS-CoV-2 Testing Results

Show  entries

Search:

| Batch Approval Date | Result Summary                                                          |
|---------------------|-------------------------------------------------------------------------|
| 2022-03-03          | SARS_CoV-2 detected in 1/442 samples (0 inconclusive, 3 not identified) |
| 2022-03-01          | SARS_CoV-2 detected in 1/418 samples (0 inconclusive, 1 not identified) |
| 2022-02-28          | SARS_CoV-2 detected in 0/434 samples (0 inconclusive, 3 not identified) |
| 2022-02-24          | SARS_CoV-2 detected in 1/415 samples (0 inconclusive, 4 not identified) |
| 2022-02-22          | SARS_CoV-2 detected in 0/368 samples (0 inconclusive, 1 not identified) |
| 2022-02-18          | SARS_CoV-2 detected in 0/68 samples (0 inconclusive, 0 not identified)  |
| 2022-02-17          | SARS_CoV-2 detected in 1/423 samples (0 inconclusive, 5 not identified) |
| 2022-02-15          | SARS_CoV-2 detected in 2/407 samples (0 inconclusive, 2 not identified) |
| 2022-02-14          | SARS_CoV-2 detected in 1/411 samples (0 inconclusive, 4 not identified) |
